# Supplementary material for: Probing fluctuations in sulfur dioxide and viscosity levels during mitochondrial dysfunction using a dual-response fluorescent probe with good water solubility
Source: Royal Society of Chemistry journal article supplement (doi:10.1039/d3an01067h), 2023-01-01
Supplement: d3an01067h1.pdf [file d3an01067h1.pdf]

# Supporting Information

## Probing fluctuations in sulfur dioxide and viscosity levels during mitochondrial dysfunction using a dual-response fluorescent probe with good water solubility

Hankun Zhang<sup>a</sup>, Wenshuo Cheng<sup>a</sup>, Siqi Zeng<sup>a</sup>, Benhua Wang<sup>a,b,\*</sup> and Xiangzhi Song<sup>a,b</sup>

<sup>a</sup>College of Chemistry & Chemical Engineering, Central South University, Changsha, Hunan 410083, China

<sup>b</sup>Shenzhen Research Institute of Central South University, Shenzhen 518057, China

\* Corresponding author. Email: benhuawang@csu.edu.cn.

## Table of Contents

|                                                           |   |
|-----------------------------------------------------------|---|
| 1. Experimental Section .....                             | 2 |
| 2. Synthesis of Probe <b>MBI</b> .....                    | 4 |
| 3. Spectroscopic Property .....                           | 5 |
| 4. <sup>1</sup> H NMR, <sup>13</sup> C NMR and HRMS ..... | 8 |
| 5. References .....                                       | 9 |

## 1. Experimental Section

**Materials and Instruments.** All commercial chemicals were purchased from suppliers and used as received.  $^1\text{H}$  NMR and  $^{13}\text{C}$  NMR spectra were obtained using a Bruker 400 spectrometer. The mass spectra were obtained using a Bruker Daltonics micr-OTOF-Q II spectrometer. Emission spectra were recorded on a Hitachi F-7000 fluorometer, and UV-vis absorption spectra were recorded on a Shimadzu UV-2450 spectrophotometer. A Leici PHS-3C pH meter was used for pH measurements. Fluorescence imaging experiments were conducted using an Olympus FV3000 inverted microscope. HeLa cells were obtained from Xiangya Hospital at Central South University, China.

**Detection Limit.** The detection limit was calculated according to the following equation:

$$\text{Detection limit} = 3\sigma/k$$

where  $\sigma$  is the standard deviation of the blank measurement, and  $k$  is the slope between the fluorescence intensity ( $F_{477\text{nm}}$ ) and  $\text{SO}_2$  concentration.

**Cytotoxicity Test.** Exponential growth HeLa cells were cultured in a high-glucose Dulbecco's modified Eagle medium (DMEM) at  $37^\circ\text{C}$  and a 5%  $\text{CO}_2$  atmosphere. HeLa cells were seeded in 96-well plates at  $10^4$  well $^{-1}$  and incubated for 24 h, then different concentrations (0  $\mu\text{M}$ , 5.0  $\mu\text{M}$ , 10.0  $\mu\text{M}$ , 15.0  $\mu\text{M}$ , and 20.0  $\mu\text{M}$ ) of **MBI** was added into 96-well plates and incubated for 24 h. The cell viability was detected by MTT assay following a standard protocol.

**Colocalization experiments.** HeLa cells were incubated with probe **MBI** (10.0  $\mu\text{M}$ ) in the culture medium for 30 min at  $37^\circ\text{C}$ , and then the cells were washed with PBS three times. Commercial fluorescent dyes including Mito-tracker Green, ER-tracker Green, and Lyso-tracker Green (1.0  $\mu\text{M}$ ) were added and co-incubated for another 30 min, and cell imaging was then carried out after washing the cells with PBS three times. Green channel:  $\lambda_{\text{abs}} = 405$  nm,  $\lambda_{\text{em}} = 500\text{-}550$  nm; Red channel:  $\lambda_{\text{abs}} = 488$  nm,  $\lambda_{\text{em}} = 570\text{-}670$  nm.

**Fluorescence Imaging of SO<sub>2</sub> in Living Cells.** For fluorescence imaging of exogenous SO<sub>2</sub> in living cells, HeLa cells were divided into two groups: the first group were incubated with probe **MBI** (10.0 μM) only for 30 min; the second group were pre-treated with probe **MBI** (10.0 μM) for 30 min, and then incubated with Na<sub>2</sub>SO<sub>3</sub> (100.0 μM) for another 30 min. For fluorescence imaging of endogenous SO<sub>2</sub> in living cells, HeLa cells were divided into two groups: the first group were incubated with probe **MBI** (10.0 μM) only for 30 min; the second group were pre-treated with probe **MBI** (10.0 μM) for 30 min, and then incubated with GSH (500.0 μM) and Na<sub>2</sub>S<sub>2</sub>O<sub>3</sub> (250.0 μM) for another 30 min. After washing three times with PBS buffer, the imaging experiments were carried out. Cyan channel:  $\lambda_{\text{ex}} = 405 \text{ nm}$ ,  $\lambda_{\text{em}} = 450\text{-}500 \text{ nm}$ ; Red channel:  $\lambda_{\text{ex}} = 488 \text{ nm}$ ,  $\lambda_{\text{em}} = 570\text{-}670 \text{ nm}$ .

**Fluorescence Imaging of Viscosity in Living Cells.** HeLa cells were divided into two groups: the first group were incubated with probe **MBI** (10.0 μM) only for 30 min; the second group were pre-treated with probe **MBI** (10.0 μM) for 30 min, and then incubated with nystatin (10.0 μM) for another 30 min. After washing three times with PBS buffer, the imaging experiments were carried out. Cyan channel:  $\lambda_{\text{ex}} = 405 \text{ nm}$ ,  $\lambda_{\text{em}} = 450\text{-}500 \text{ nm}$ ; Red channel:  $\lambda_{\text{ex}} = 488 \text{ nm}$ ,  $\lambda_{\text{em}} = 570\text{-}670 \text{ nm}$ .

**Fluorescence Imaging of SO<sub>2</sub> and Viscosity during Cell Apoptosis Induced by Cisplatin.** HeLa cells were divided into two groups: the first group were incubated with probe **MBI** (10.0 μM) only for 30 min; the second group were pre-treated with probe **MBI** (10.0 μM) for 30 min, and then incubated with cisplatin (10.0 μM) for another 30 min. After washing three times with PBS buffer, the imaging experiments were carried out. Cyan channel:  $\lambda_{\text{ex}} = 405 \text{ nm}$ ,  $\lambda_{\text{em}} = 450\text{-}500 \text{ nm}$ ; Red channel:  $\lambda_{\text{ex}} = 488 \text{ nm}$ ,  $\lambda_{\text{em}} = 570\text{-}670 \text{ nm}$ .

## 2. Synthesis of Probe MBI

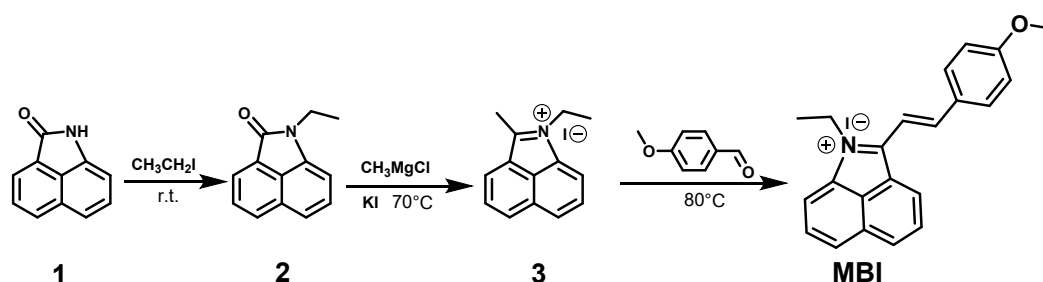

**Scheme S1.** Synthesis route for probe **MBI**.

**Synthesis of compounds 2 and 3.** The synthesis of compounds **2** and **3** was referred to the literature that has been reported.<sup>1</sup>

**Synthesis of probe MBI.** Compound **3** (100.0 mg, 0.31 mmol) and anisaldehyde (42.0 mg, 0.31 mmol) were dissolved in 5.0 mL absolute ethanol and the mixture was refluxed for 6 h under argon protection. After the reaction, the solvent was removed under reduced pressure and 20 mL of ethyl acetate was added. Stirring was continued at 80 °C for 1 h, followed by sonication for 30 min. The resulting solution was then cooled to room temperature to produce a precipitate, which was filtered and dried to obtain probe **MBI** as black solid (105.0 mg, 71.4%). <sup>1</sup>H NMR (400 MHz, DMSO-*d*<sub>6</sub>) δ 9.35 (t, *J* = 6.1 Hz, 1H), 8.84 (dd, *J* = 16.0, 4.8 Hz, 1H), 8.72 (t, *J* = 6.3 Hz, 1H), 8.36 (dt, *J* = 14.4, 6.2 Hz, 2H), 8.29 (dd, *J* = 8.7, 5.8 Hz, 2H), 8.16 (t, *J* = 7.7 Hz, 1H), 7.94 (dt, *J* = 23.3, 9.2 Hz, 2H), 7.21 (s, 2H), 4.93 – 4.80 (m, 2H), 3.93 (d, *J* = 3.7 Hz, 3H), 1.60 – 1.49 (m, 3H). <sup>13</sup>C NMR (100 MHz, DMSO-*d*<sub>6</sub>) δ 164.28, 161.97, 153.79, 137.08, 135.52, 133.72, 131.36, 130.27, 129.21, 128.23, 127.83, 127.41, 119.30, 115.44, 112.70. HRMS (ESI) *m/z*: *calcd* for C<sub>22</sub>H<sub>20</sub>NO<sup>+</sup>[M]<sup>+</sup>, 314.15; *found*, 314.1502.

### 3. Spectroscopic Property

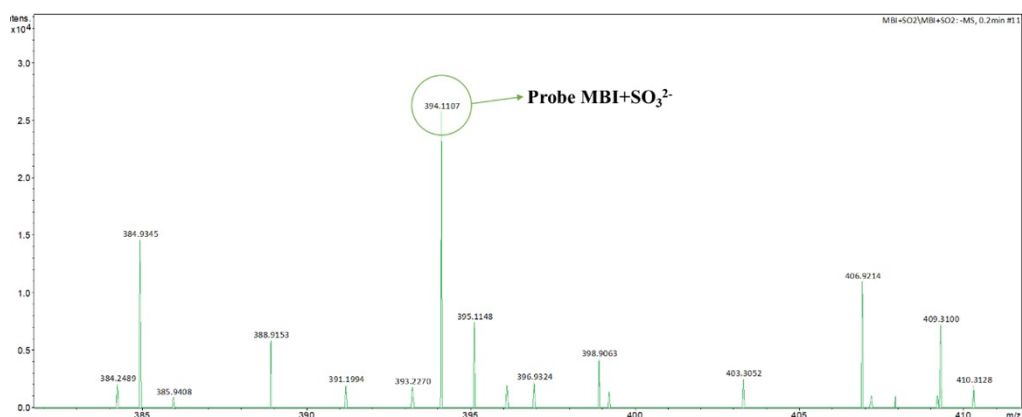

**Fig. S1** HRMS spectrum of the reaction mixture of probe **MBI** and  $\text{SO}_2$ .

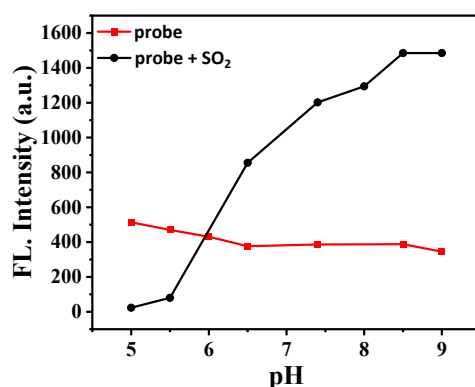

**Fig. S2** pH influence on the fluorescence intensity of **MBI** ( $10.0 \mu\text{M}$ ) at 477 nm with and without  $\text{SO}_2$  ( $2.0 \mu\text{M}$ ) in water. Excitation wavelength: 405 nm.

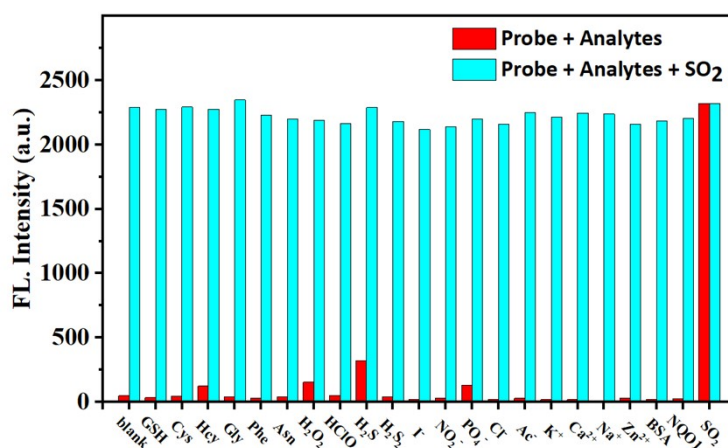

**Fig.S3** Fluorescence intensity of probe **MBI** ( $10.0 \mu\text{M}$ ) at 477 nm in the absence and presence of  $\text{SO}_2$  ( $2 \mu\text{M}$ ) with the co-existence of relevant species ( $200.0 \mu\text{M}$ ), including GSH, Cys, Hcy, Gly, Phe, Asn,  $\text{H}_2\text{O}_2$ , HClO,  $\text{H}_2\text{S}$ ,  $\text{H}_2\text{S}_2$ ,  $\text{I}^-$ ,  $\text{NO}_2^-$ ,  $\text{PO}_4^-$ ,  $\text{Cl}^-$ ,  $\text{Ac}^-$ ,  $\text{K}^+$ ,  $\text{Ca}^{2+}$ ,  $\text{Na}^+$ ,  $\text{Zn}^{2+}$ , BSA, and NQO1. Excitation wavelength: 405 nm.

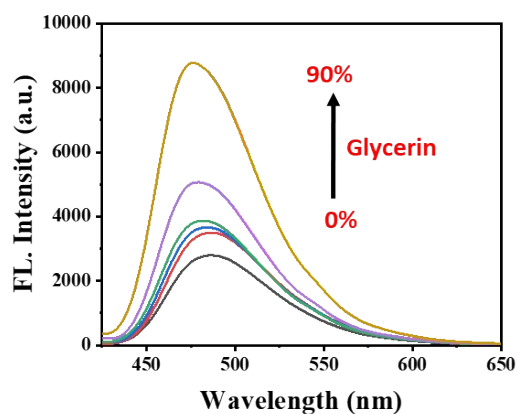

**Fig.S4** Fluorescence spectra of probe **MBI** (10.0  $\mu\text{M}$ ) in the presence of  $\text{SO}_2$  (2.0  $\mu\text{M}$ ) under different viscosity conditions. Excitation wavelength: 405 nm.

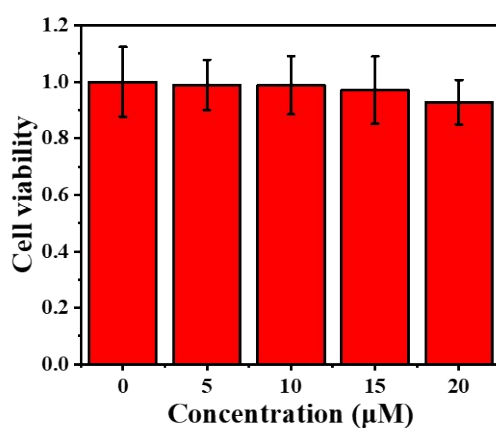

**Fig.S5** MTT assay of HeLa cells incubated with different concentrations of probe **MBI** for 24 h.

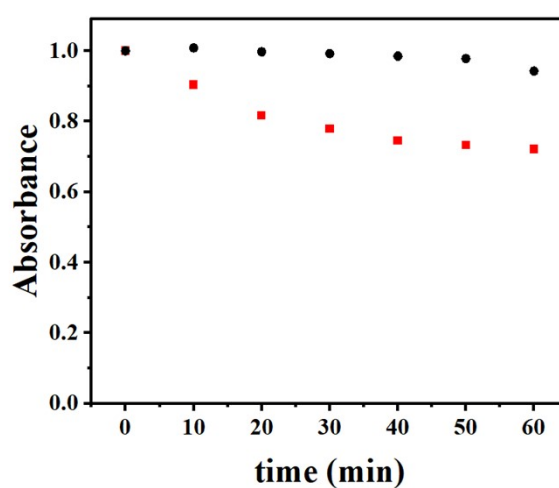

**Fig. S6** Time-dependent absorbance changes of probe **MBI** under dark (black line) and a 480-490 nm LED light irradiation (red line) in water.

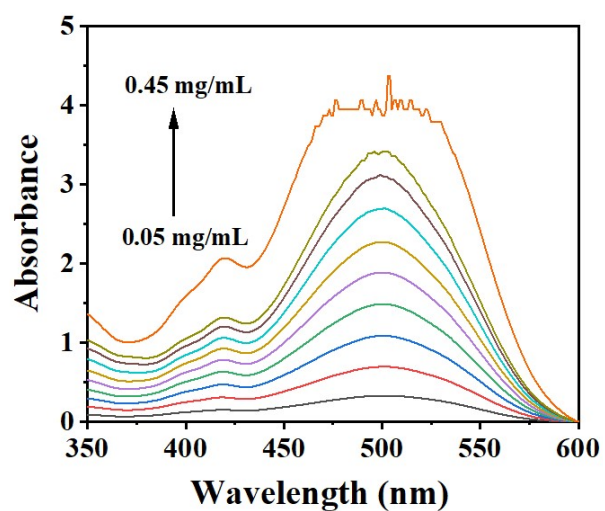

**Fig. S7** UV-vis absorption spectra of different concentrations of probe **MBI**.

**Table S1.** Fluorescent quantum yield of probe **MBI** in water containing different proportion of glycerol.

| Proportion of glycerol in water      | 0%    | 30%   | 50%   | 80%   |
|--------------------------------------|-------|-------|-------|-------|
| Fluorescent quantum yield ( $\phi$ ) | 0.003 | 0.018 | 0.032 | 0.187 |

#### 4. $^1\text{H}$ NMR, $^{13}\text{C}$ NMR and HRMS

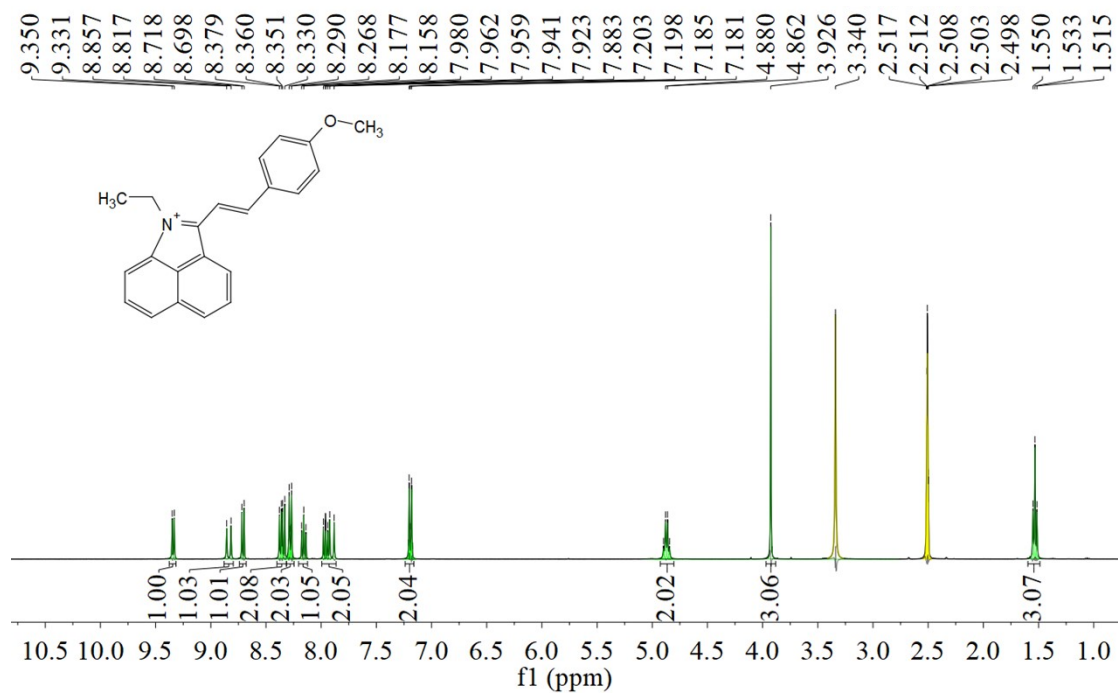

Fig.S8  $^1\text{H}$  NMR spectrum of probe MBI in  $\text{DMSO-}d_6$ .

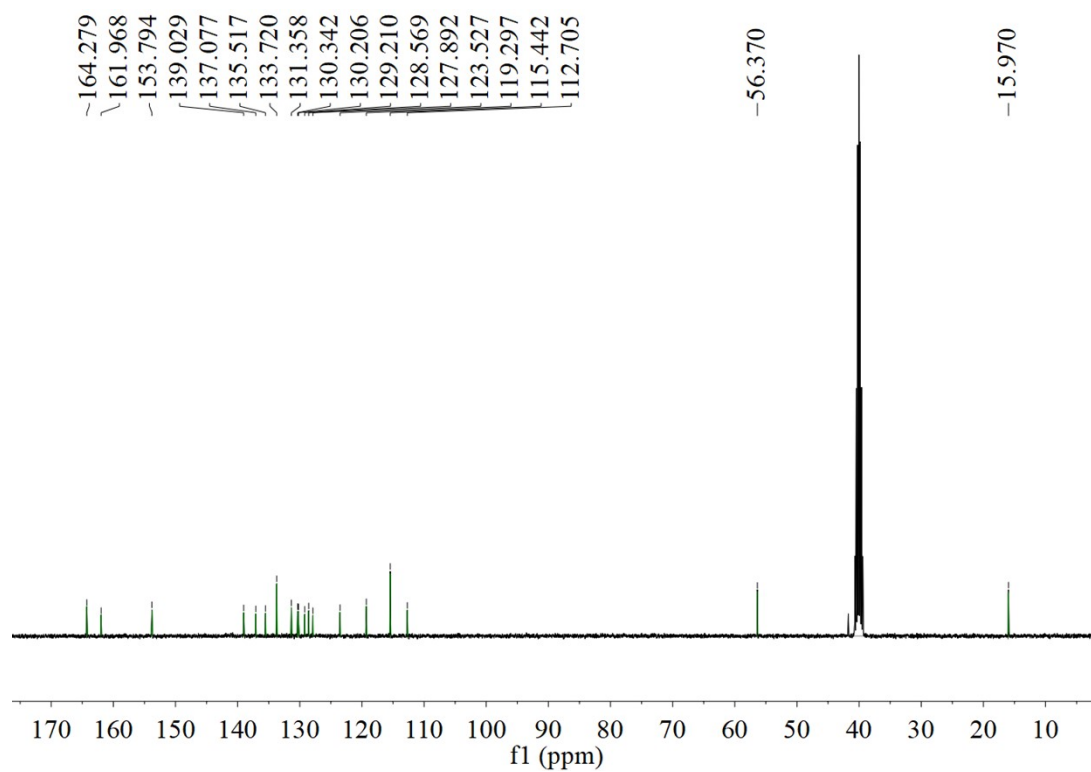

Fig. S9  $^{13}\text{C}$  NMR spectrum of probe MBI in  $\text{DMSO-}d_6$ .



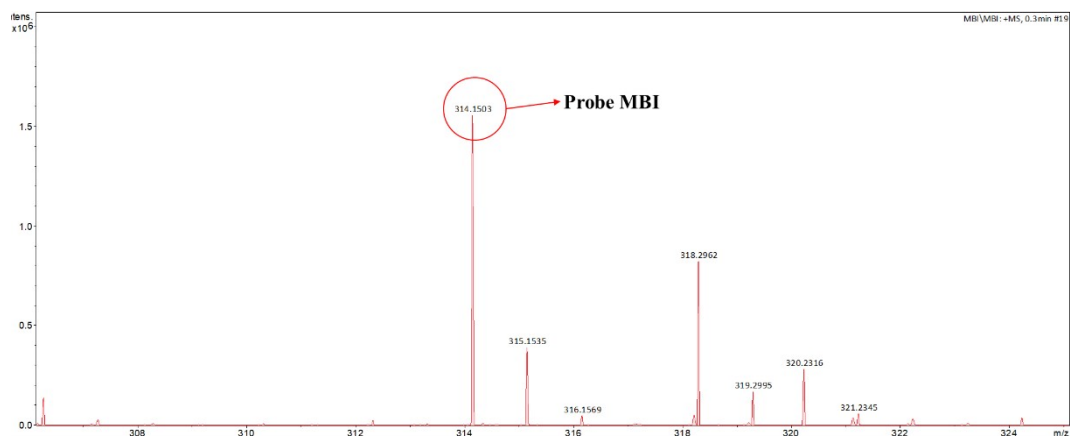

**Fig.S10** HRMS spectrum of **MBI**.

## 5. References

1. D. Yao, Y. Wang, R. Zou, K. Bian, P. Liu, S. Shen, W. Yang, B. Zhang and D. Wang, *ACS Appl. Mater. Interfaces*, 2020, **12**, 4276-4284.
